# Supplementary material for: An exceptional horizontal gene transfer in plastids: gene replacement by a distant bacterial paralog and evidence that haptophyte and cryptophyte plastids are sisters
Source: PubMed Central journal article supplement (PMC1570145; doi:10.1186/1741-7007-4-31), 2006-09-06

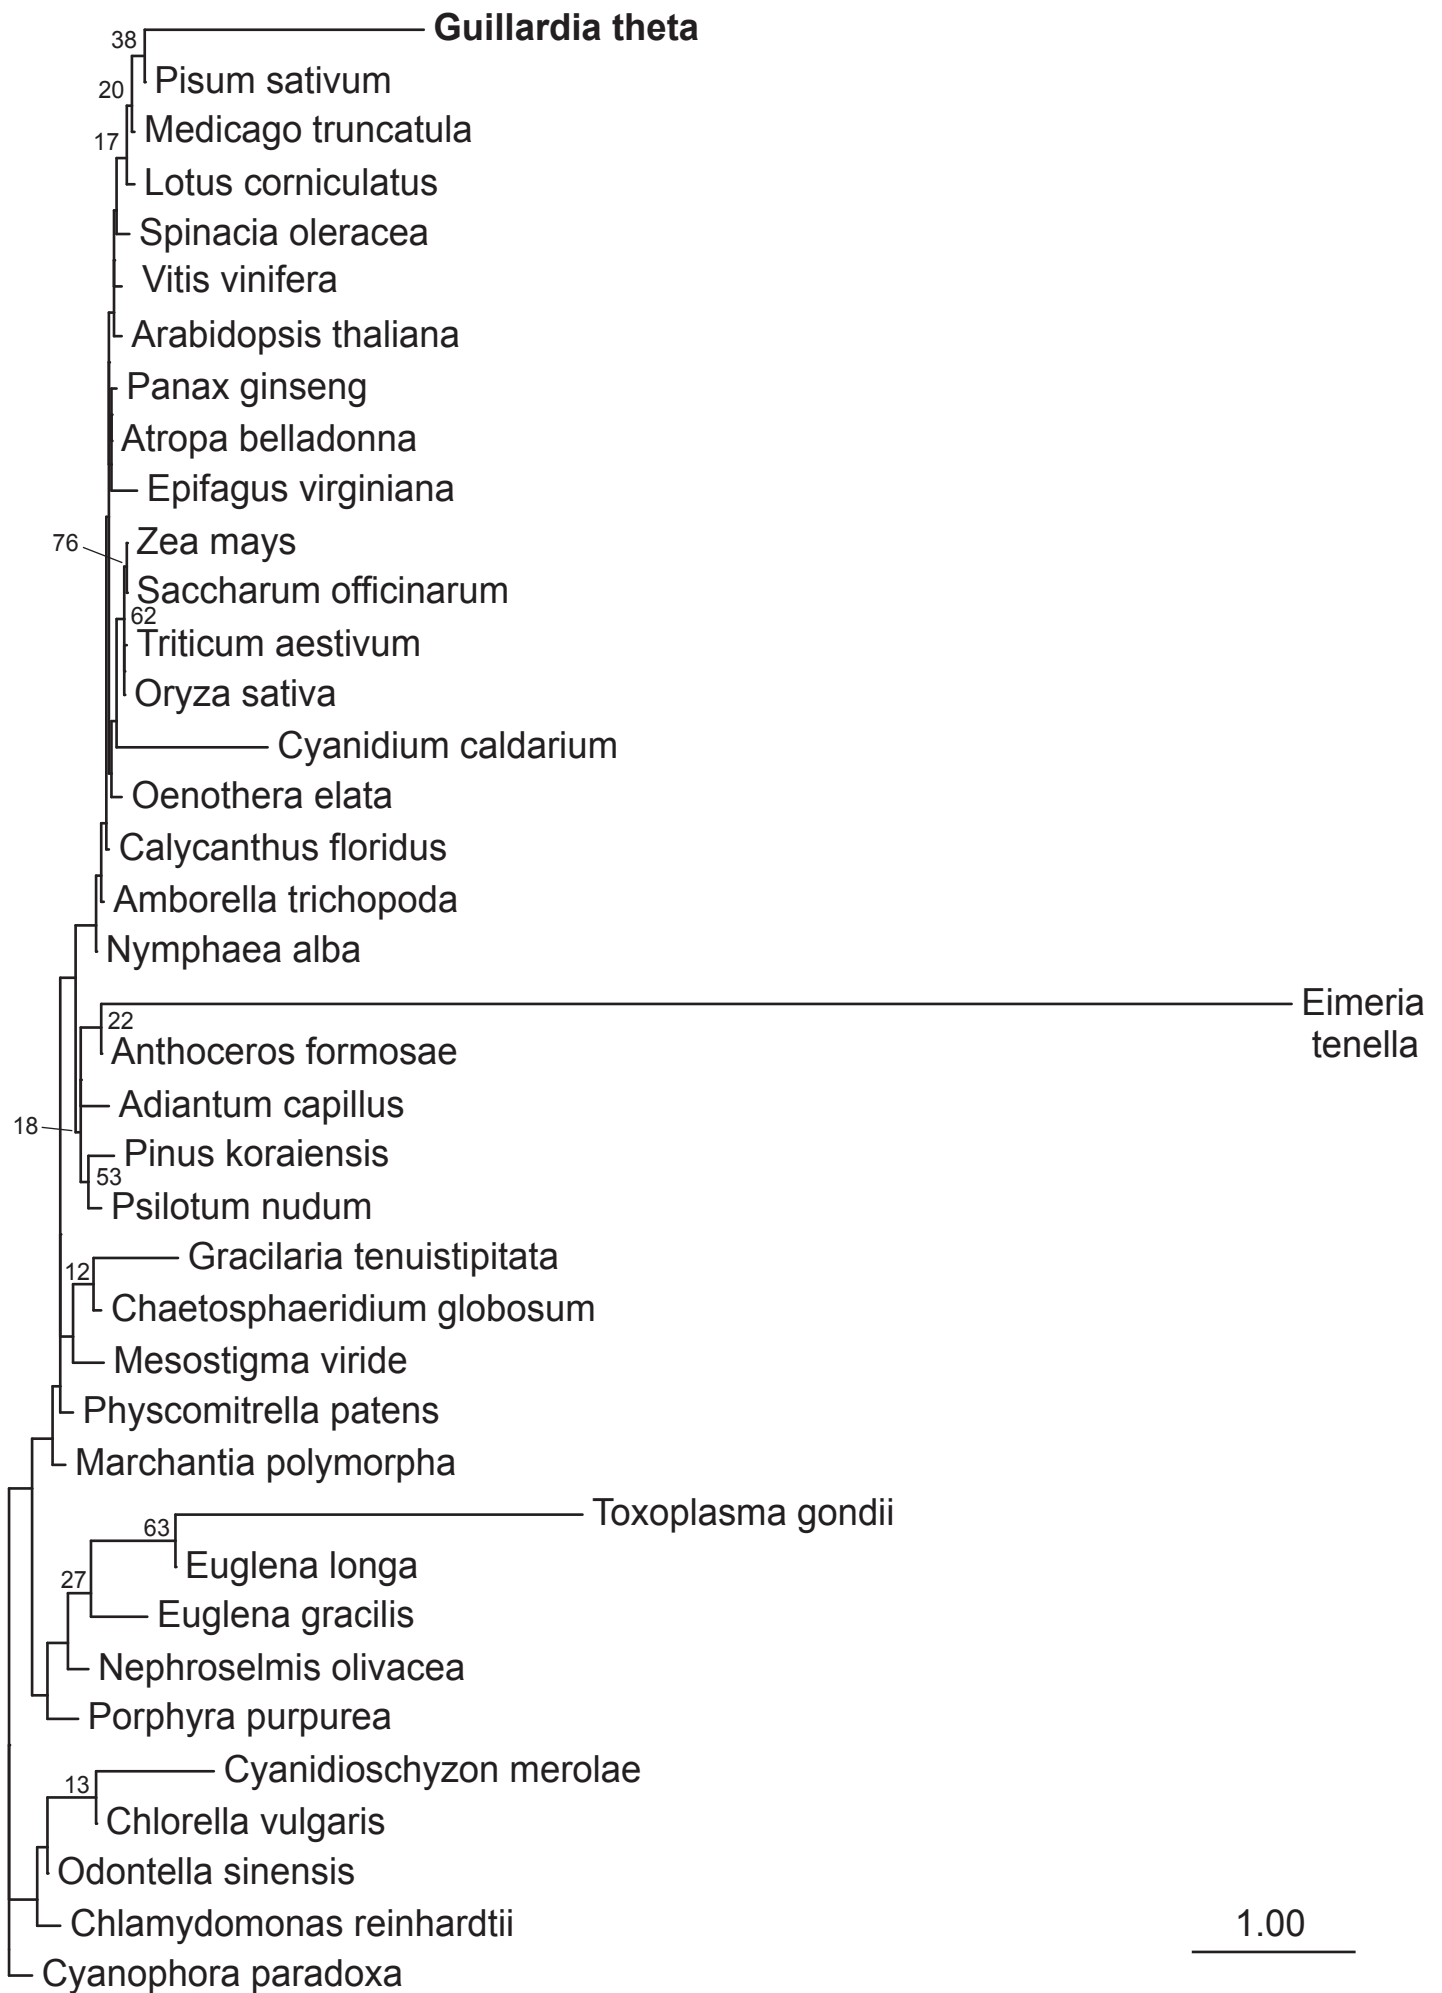

Supplement: 1741-7007-4-31-S3.pdf [file 1741-7007-4-31-S3.pdf]
