# Supplementary material for: An exceptional horizontal gene transfer in plastids: gene replacement by a distant bacterial paralog and evidence that haptophyte and cryptophyte plastids are sisters
Source: PubMed Central journal article supplement (PMC1570145; doi:10.1186/1741-7007-4-31), 2006-09-06
Supplement: 1741-7007-4-31-S7.pdf [file 1741-7007-4-31-S7.pdf]

## Scrutiny of long branched lineages

The approach employed here is limited by the taxon sampling. Because our initial trees included only plastid genes, we could essentially detect HGT only from one plastid genome to another, but not transfers from other genomes into plastids. For example, the well-known *rbcL* conflict was not detected in our initial automated analyses because the *rbcL* tree was rooted on *Cyanophora* and the red algae came out artifactually in their expected position (albeit with a very long branch). In the case of *rpl36*, *Guillardia* branched within angiosperms, but with very weak support (Additional File 3). If the *Guillardia* gene were longer we probably would have recognized this conflict. However, unless a conflict arising from a transfer outside of plastids fortuitously results in the standard plastid topology (as for the red algae *rbcL*), or the bootstrap support is low, such conflicts would be detected by our initial phylogenetic screen.

To detect any other *rbcL*-like situations, we parsed all of our gene trees to find branches significantly longer than the average branch length for that tree. We calculated the z-score for each branch in each tree as  $z_i = (bl_i - \overline{bl})/sd$  where  $bl_i$  is a particular branch length in a tree,  $\overline{bl}$  is the mean branch length for that tree, and  $sd$  is the standard deviation of branch lengths for that tree. The z-scores for the branches leading to the red algae for *rbcL* and to *Guillardia* for *rpl36* were among the highest, with z-scores greater than 6.0 (see table below). Many of the large z-scores were from the highly divergent and AT-rich genes of the apicomplexans, as expected [1-3]. Excluding branches leading to apicomplexans from the calculation, we analyzed the 45 genes with z-scores greater than 4.0 by searching the protein sequences of the long branch taxa against all available bacterial and eukaryotic nucleotide sequences in the default NCBI database using TBLASTN and building trees from the taxa hit by BLAST [4]. None of these showed the level of phylogenetic support for extra-plastidic HGT found for *rbcL* and *rpl36*, and none were deemed good candidates. Although many genes were very divergent from all other plastid genes, none had unambiguous affinity to other, non-plastid groups.

| <b>z-score</b> | <b>gene</b>  | <b>taxon</b>               |
|----------------|--------------|----------------------------|
| <b>7.84</b>    | <b>rbcL</b>  | <b>Red lineage</b>         |
| 7.65           | petN         | Pinus koraiensis           |
| 6.87           | rpl23        | Oryza sativa               |
| 6.83           | rps2         | Chlamydomonas reinhardtii  |
| <b>6.45</b>    | <b>rpl36</b> | <b>Guillardia theta</b>    |
| 6.21           | psbG         | Pinus koraiensis           |
| 5.88           | psbN         | Euglena gracilis           |
| 5.56           | psbA         | Euglena gracilis           |
| 5.54           | rpl14        | Euglena longa              |
| 5.40           | rps12        | Euglena longa              |
| 5.13           | ndhA         | Nephroselmis olivacea      |
| 5.10           | psbB         | Euglena gracilis           |
| 5.07           | petG         | Cyanidium caldarium        |
| 5.06           | psbJ         | Chlamydomonas reinhardtii  |
| 4.96           | ycf4         | Euglena gracilis           |
| 4.93           | matK         | Chaetosphaeridium globosum |
| 4.88           | psbK         | Euglena gracilis           |
| 4.80           | rpoA         | Euglenids                  |
| 4.78           | tufA         | Chaetosphaeridium globosum |

|      |       |                            |
|------|-------|----------------------------|
| 4.77 | ndhH  | Nephroselmis olivacea      |
| 4.77 | atpH  | Euglena gracilis           |
| 4.72 | psbC  | Euglena gracilis           |
| 4.69 | ndhJ  | Adiantum capillus          |
| 4.68 | ycf9  | Cyanidium caldarium        |
| 4.64 | ycf2  | Chaetosphaeridium globosum |
| 4.60 | rpl22 | Cyanidium caldarium        |
| 4.60 | psbI  | Euglena gracilis           |
| 4.55 | psbT  | Nephroselmis olivacea      |
| 4.54 | psaA  | Euglena gracilis           |
| 4.52 | rps18 | Cyanidium caldarium        |
| 4.52 | psbD  | Euglena gracilis           |
| 4.51 | rps3  | Euglena longa              |
| 4.49 | rps11 | Cyanidium caldarium        |
| 4.44 | rpoC2 | Chlorella vulgaris         |
| 4.39 | rpl2  | Cyanidioschyzon merolae    |
| 4.35 | ycf9  | Euglena gracilis           |
| 4.21 | ndhG  | Nephroselmis olivacea      |
| 4.15 | psaJ  | Cyanophora paradoxa        |
| 4.07 | rps7  | Euglena longa              |
| 4.07 | rpl20 | Euglenids                  |
| 4.04 | rpl32 | Cyanidioschyzon merolae    |
| 4.03 | rps15 | Adiantum capillus          |
| 4.00 | atpE  | Euglena gracilis           |

1. Wilson RJ, Denny PW, Preiser PR, Rangachari K, Roberts K, Roy A, Whyte A, Strath M, Moore DJ, Moore PW, Williamson DH: **Complete gene map of the plastid-like DNA of the malaria parasite *Plasmodium falciparum*.** *J Mol Biol* 1996, **261**:155-172.
2. Kohler S, Delwiche CF, Denny PW, Tilney LG, Webster P, Wilson RJ, Palmer JD, Roos DS: **A plastid of probable green algal origin in Apicomplexan parasites.** *Science* 1997, **275**:1485-1489.
3. Cai X, Fuller AL, McDougald LR, Zhu G: **Apicoplast genome of the coccidian *Eimeria tenella*.** *Gene* 2003, **321**:39-46.
4. Altschul SF, Madden TL, Schaffer AA, Zhang J, Zhang Z, Miller W, Lipman DJ: **Gapped BLAST and PSI-BLAST: a new generation of protein database search programs.** *Nucleic Acids Res* 1997, **25**:3389-3402.
